# Supplementary material for: CARM1 and Paraspeckles Regulate Pre-implantation Mouse Embryo Development
Source: PubMed Central journal article supplement (PMC6292842; doi:10.1016/j.cell.2018.11.027), 2018-12-13
Supplement: mmc1.pdf [file mmc1.pdf]

Cell, Volume 175

## **Supplemental Information**

### **CARM1 and Paraspeckles Regulate Pre-implantation**

#### **Mouse Embryo Development**

**Anna Hupalowska, Agnieszka Jedrusik, Meng Zhu, Mark T. Bedford, David M. Glover, and Magdalena Zernicka-Goetz**

| <b>qRT-PCR primers</b>                                                                |                        |                         |
|---------------------------------------------------------------------------------------|------------------------|-------------------------|
| <b>Name</b>                                                                           | <b>Forward</b>         | <b>Reverse</b>          |
| Carm1                                                                                 | TGACATCAGTATTGTGGCACAG | CTGAGGAGCCTAAGGGAATCA   |
| Cdx2                                                                                  | CAAGGACGTGAGCATGTATCC  | GTAACCACCGTAGTCCGGGTA   |
| Gapdh                                                                                 | TGGATTTGGACGCATTGGTC   | TTTGCACCTGGTACGTGTTGAT  |
| Histone H2B                                                                           | TCCGCGTTTCCGTAGTACAAC  | GGGGCTGGAGCTGATTTGG     |
| Nanog                                                                                 | TCTTCCTGGTCCCCACAGTTT  | GCAAGAATAGTTCTCGGGATGAA |
| Neat1                                                                                 | GCTCTGGGACCTTCGTGACTCT | CTGCCTTGGCTTGAAATGTAA   |
| Oct3/4                                                                                | CACCATCTGTCGCTTCGAGG   | AGGGTCTCCGATTTGCATATCT  |
| p54nrb                                                                                | GCCAGAATGAAGGCTTGACTAT | TATCAGGGGGAAGATTGCCCA   |
| Pspc1                                                                                 | CCGCCTGGAATCGAGAACAC   | CTTGACCGTTAGGGCTGCT     |
| Sox2                                                                                  | GCGGAGTGGAACCTTTGTCC   | CGGGAAGCGTGTACTTATCCTT  |
| <b>Small interfering RNA (siRNA), stealth siRNA, antisense oligonucleotides (ASO)</b> |                        |                         |
| <b>Name</b>                                                                           | <b>Sequence</b>        | <b>Source</b>           |
| p54 siRNA                                                                             | AGGCTTGACTATTGACCTGAA  | Qiagen                  |
| p54 siRNA                                                                             | TTGGCTTTATTCGCTTGGA    | Qiagen                  |
| p54 siRNA                                                                             | TTCCCTGCTTGTACTACTCTA  | Qiagen                  |
| CARM1 stealth siRNA                                                                   | CGGACTTCAAGGACAAGAT    | Invitrogen              |
| Neat1_1 ASO                                                                           | TAGATTAAGACGAGGC       | Exiqon                  |
| Neat1_2 ASO                                                                           | AAGATGCAGCAGTCGA       | Exiqon                  |

**Table S1. Oligonucleotides.** Sequences of qRT-PCR primers, siRNAs, stealth siRNAs and antisense oligonucleotides (ASOs). Related to *Figure STAR Methods (KEY RESOURCES TABLE)*.
